# Supplementary figures and images for: Exon-level expression analyses identify MYCN and NTRK1 as major determinants of alternative exon usage and robustly predict primary neuroblastoma outcome
Source: PubMed Central journal article supplement — Br J Cancer. 2012 Oct 9;107(8):1409–17. doi: 10.1038/bjc.2012.391 (PMC3494449; doi:10.1038/bjc.2012.391), 2012-10-09

## TPRG1L

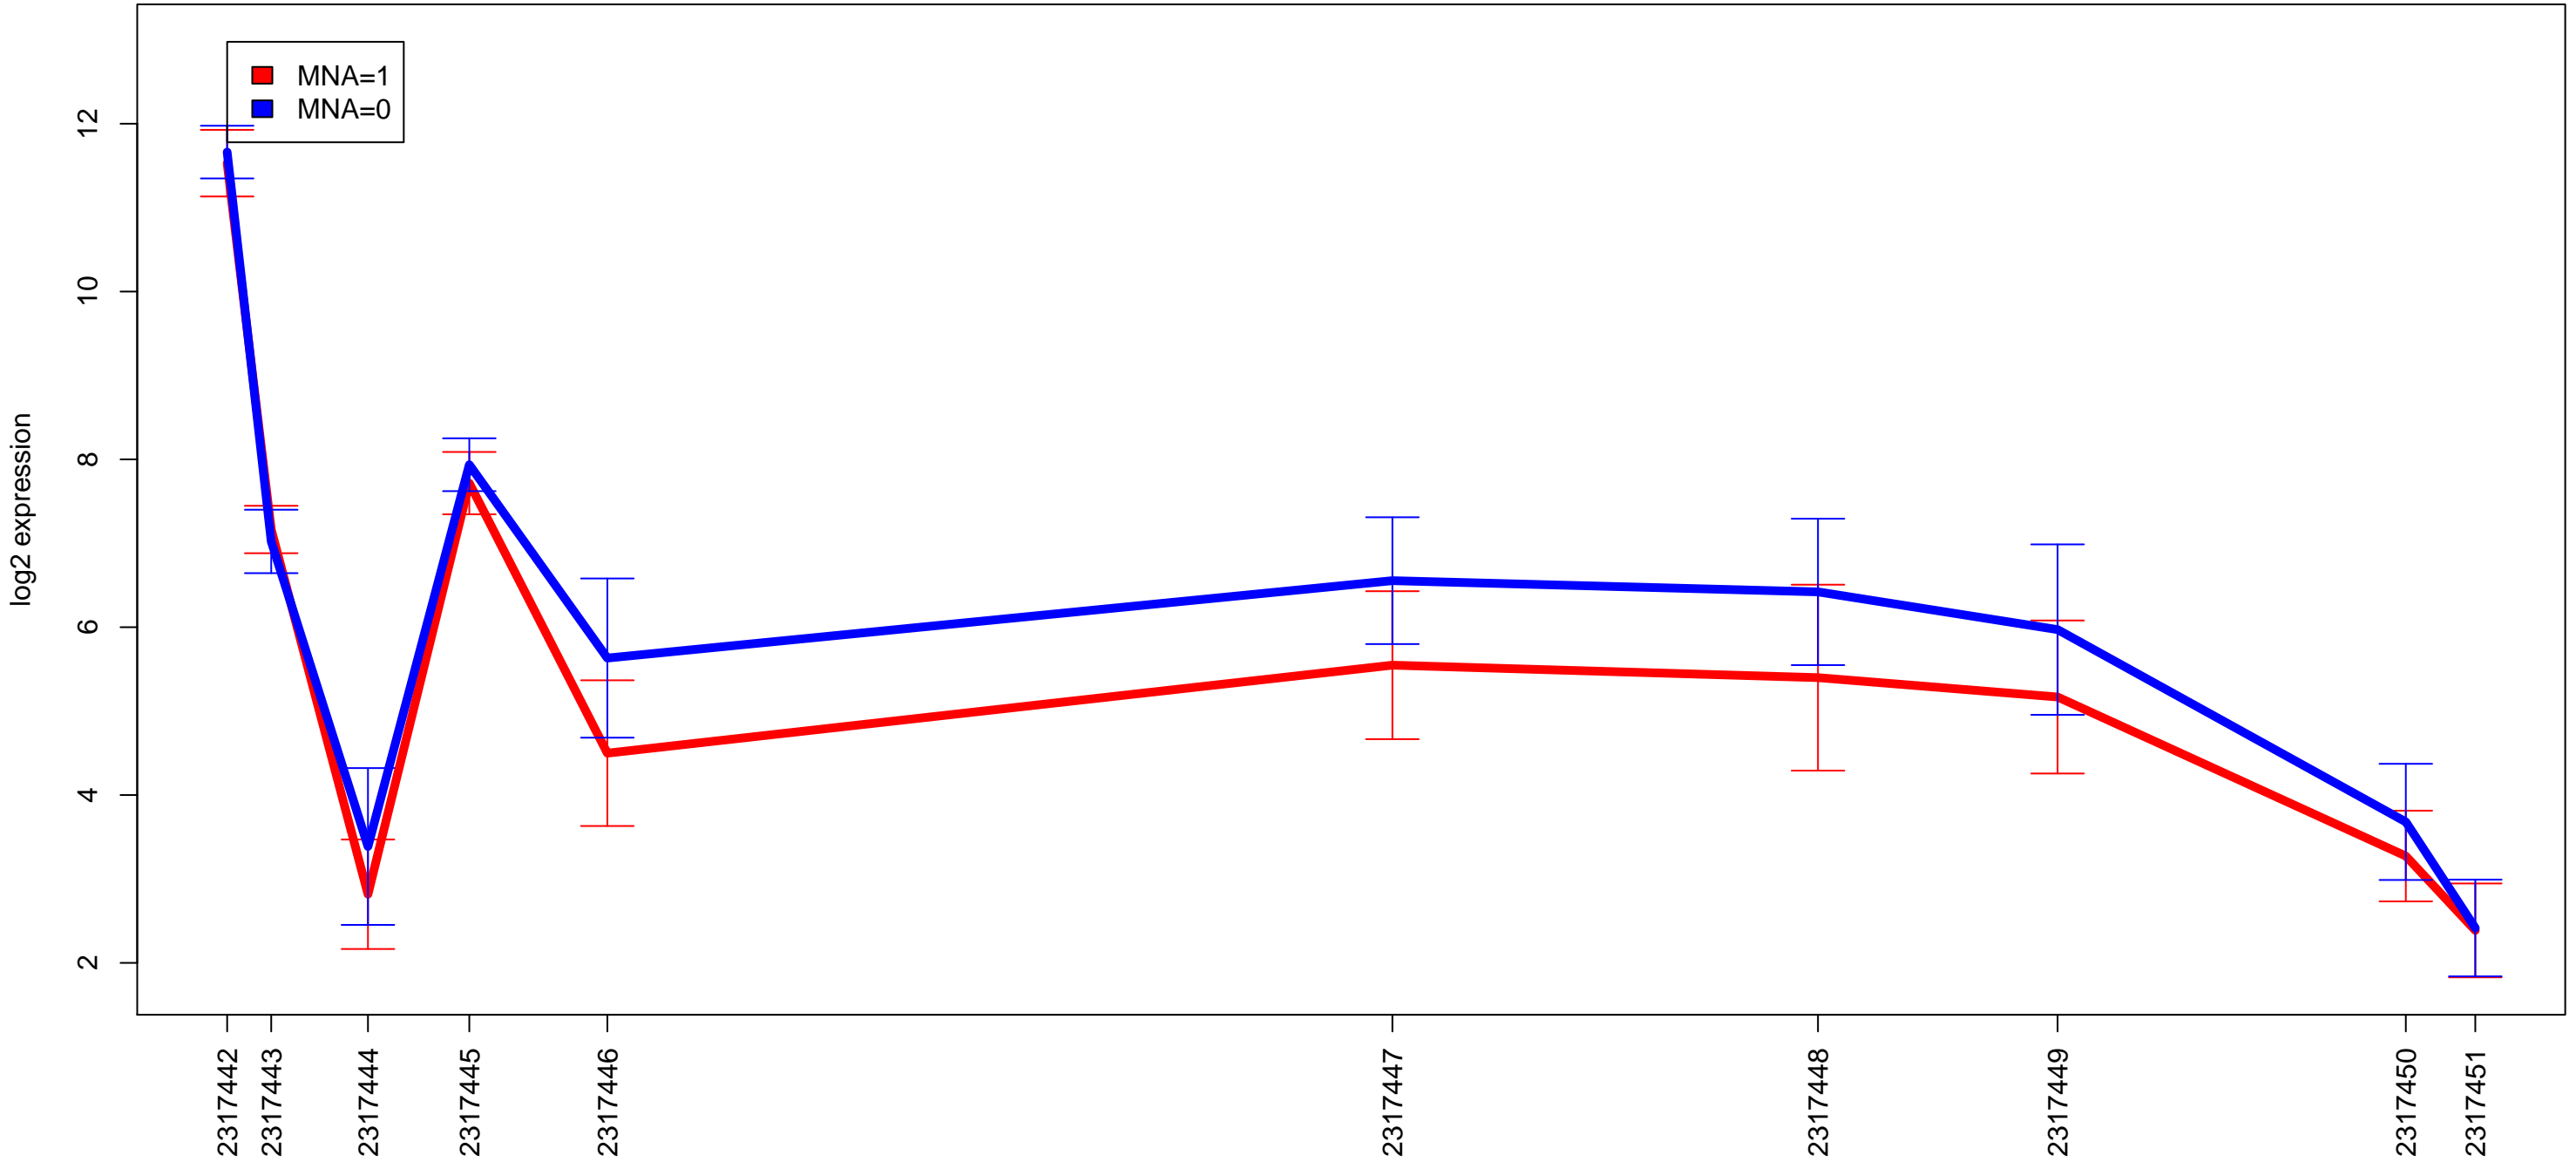

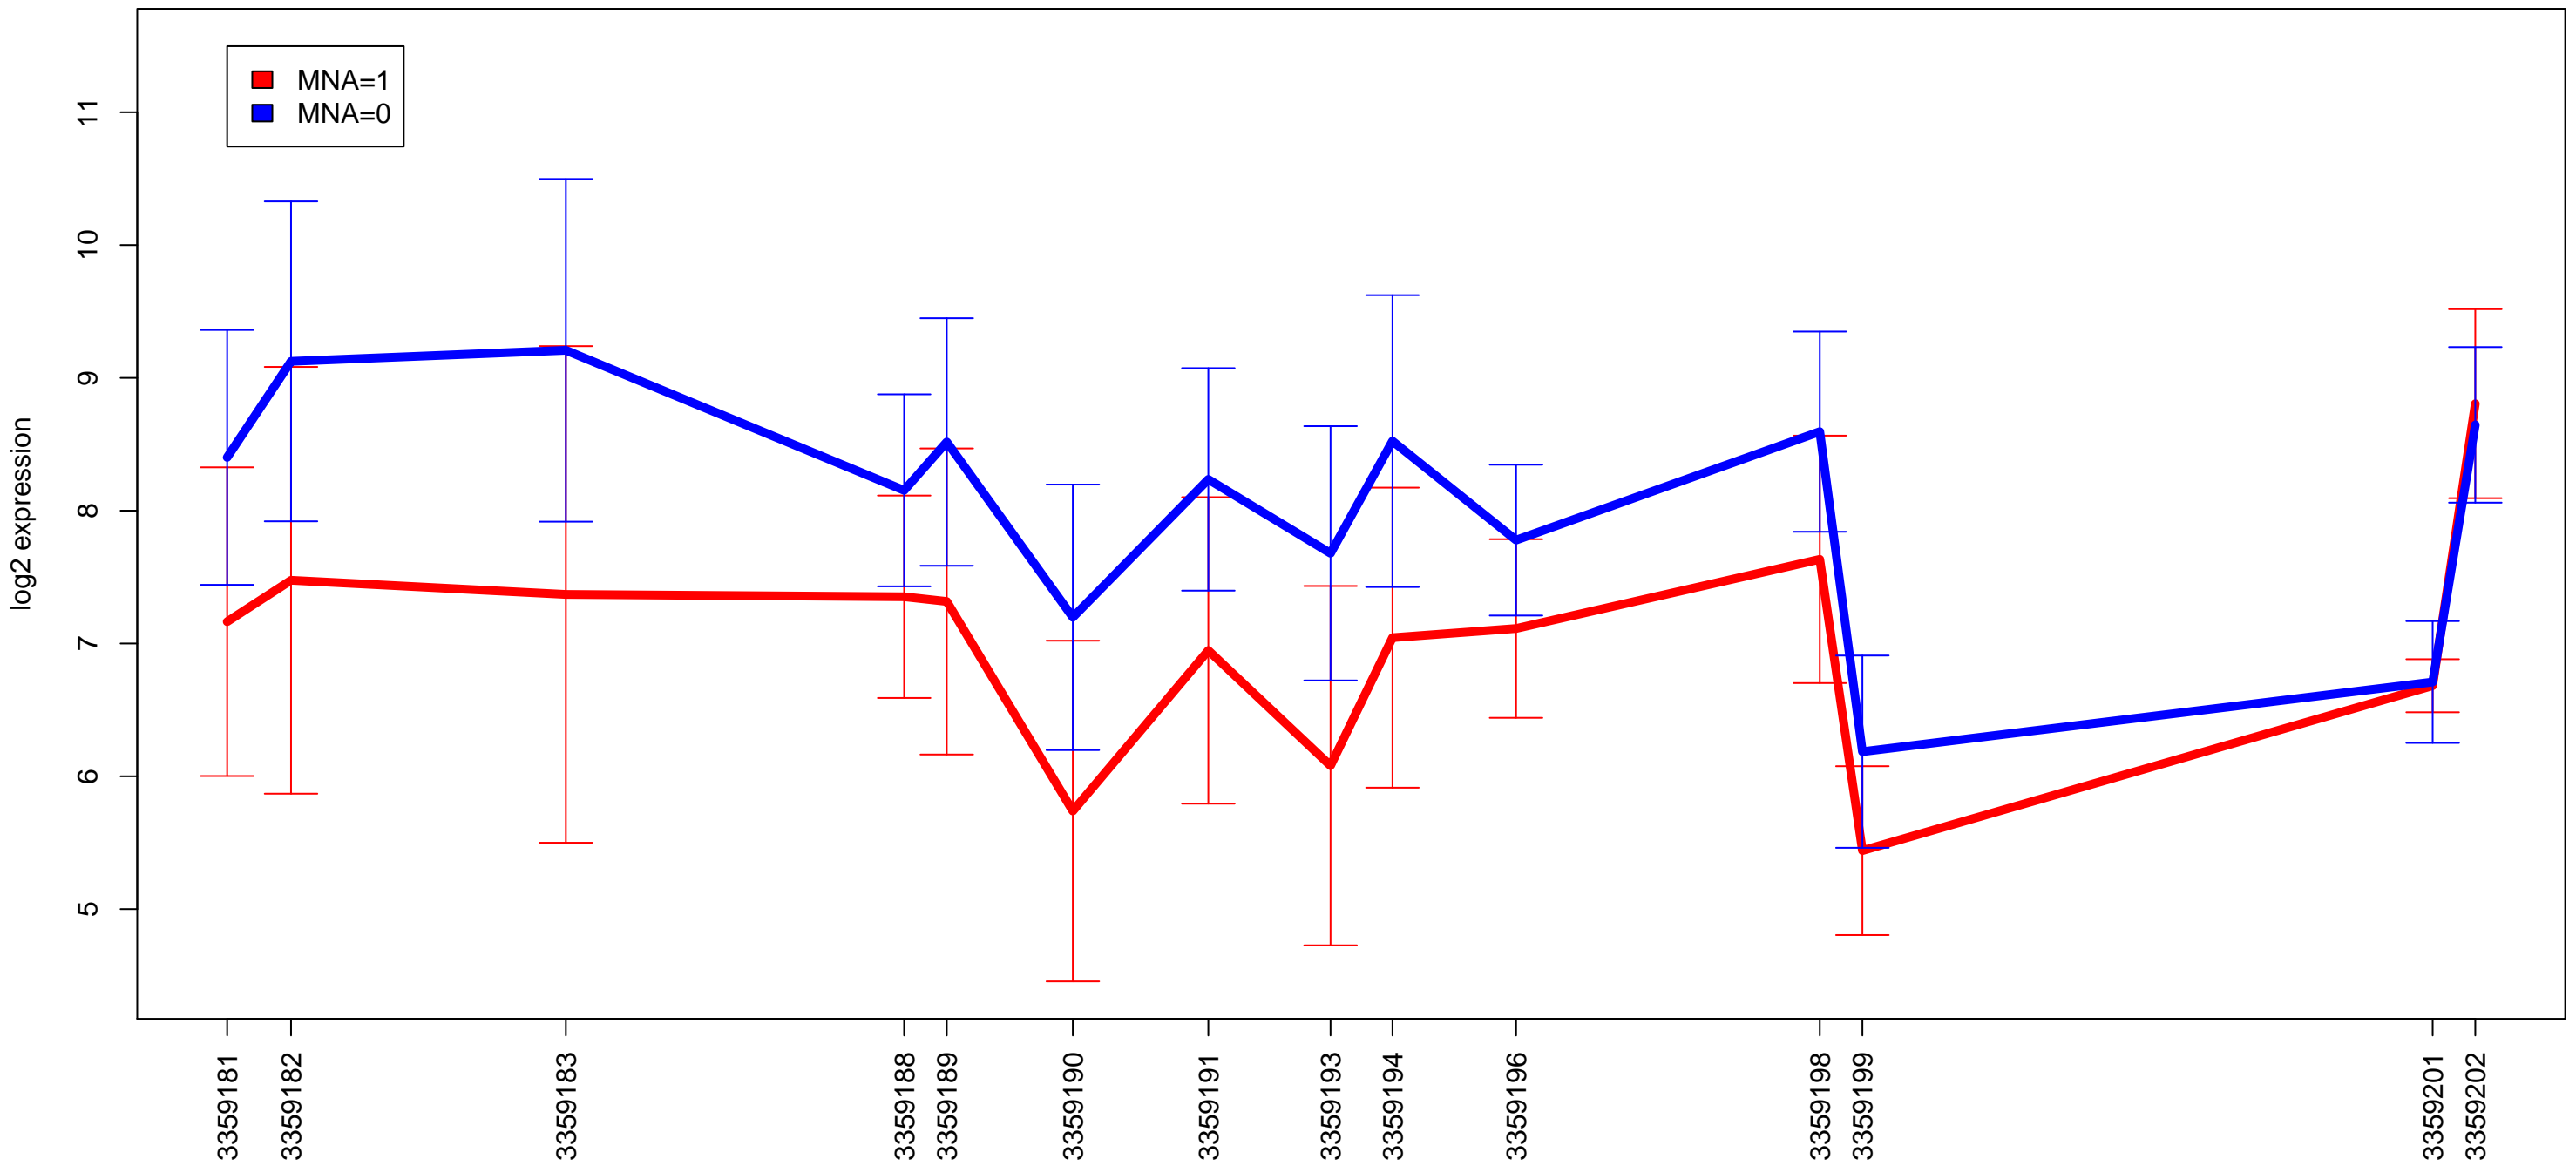

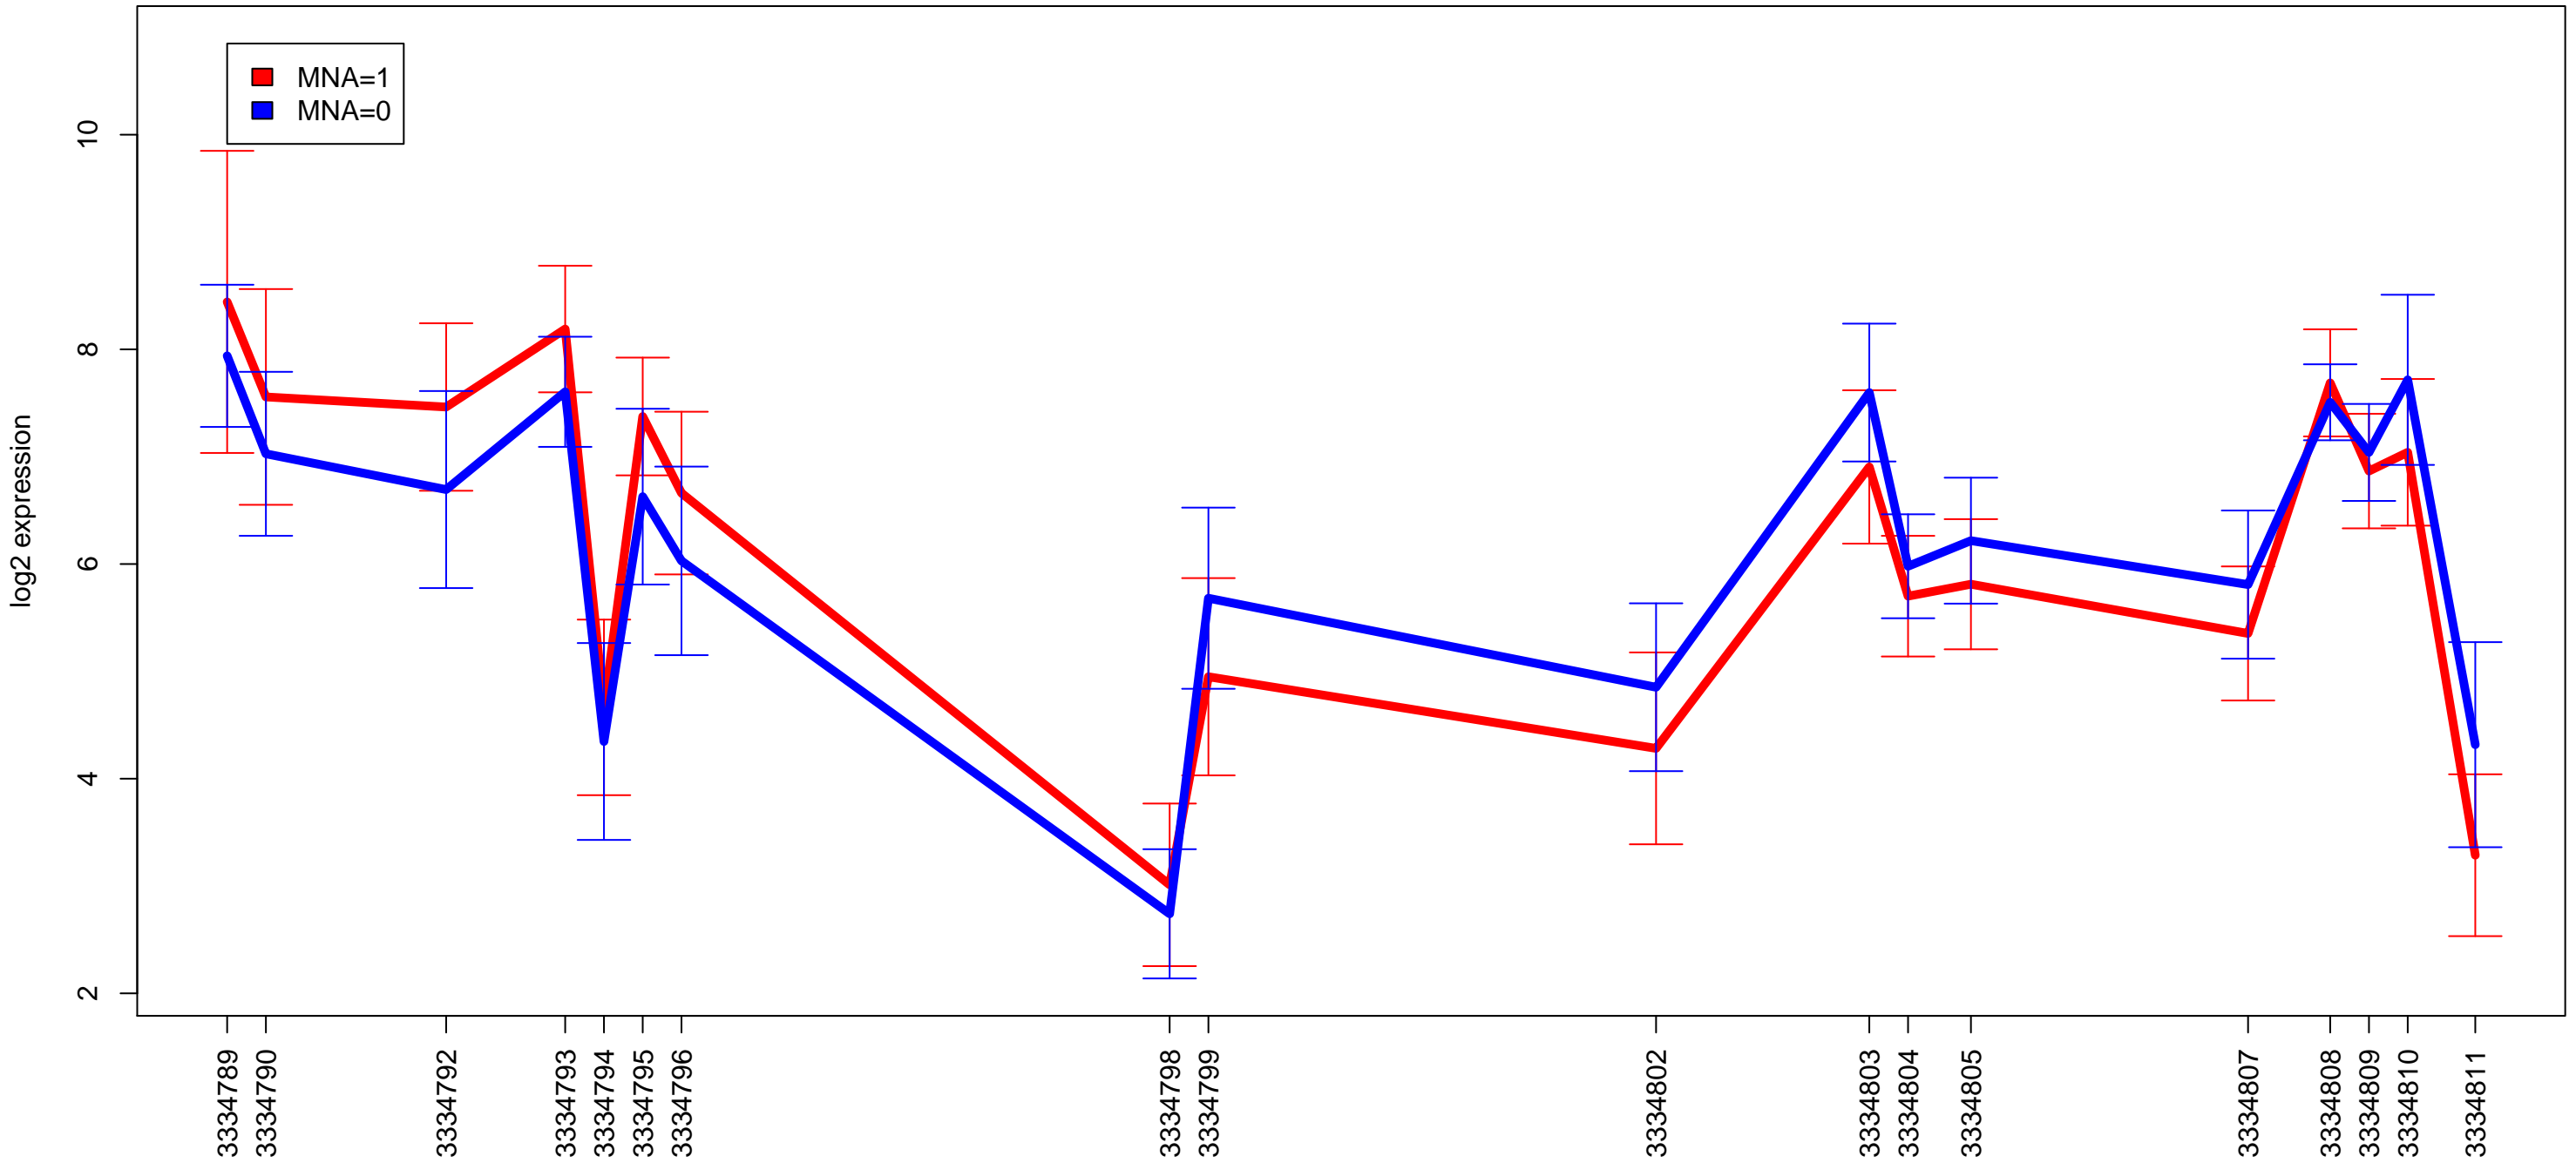

Supplement: bjc2012391x1.pdf [file bjc2012391x1.pdf]
